# Supplementary material for: Principles and Overview of Sampling Methods for Modeling Macromolecular Structure and Dynamics
Source: PubMed Central journal article supplement (PMC4849799; doi:10.1371/journal.pcbi.1004619), 2016-04-28
Supplement: pcbi.1004619.s001.pdf [file pcbi.1004619.s001.pdf]

# Supporting Information

## S1 Text

### Abbreviations in alphabetical order

|                                                                                                          |    |
|----------------------------------------------------------------------------------------------------------|----|
| AdK, <b>A</b> denylate <b>K</b> inase;                                                                   | 3  |
| ANM, <b>A</b> nisotropic <b>N</b> etwork <b>M</b> odel;                                                  | 4  |
| CADD, <b>C</b> omputer- <b>A</b> ssisted <b>D</b> rug <b>D</b> iscovery;                                 | 5  |
| CASP, <b>C</b> ritical <b>A</b> ssessment of protein <b>S</b> tructure <b>P</b> rediction;               | 6  |
| cryo-EM, cryo- <b>E</b> lectron <b>M</b> icroscopy;                                                      | 7  |
| DIMS, <b>D</b> ynamic <b>I</b> mportance <b>S</b> ampling;                                               | 8  |
| EA, <b>E</b> volutionary <b>A</b> lgorithm;                                                              | 9  |
| ENM, <b>E</b> lastic <b>N</b> etwork <b>M</b> odel;                                                      | 10 |
| EST, <b>E</b> xpansive <b>S</b> paces <b>T</b> ree;                                                      | 11 |
| GA, <b>G</b> enetic <b>A</b> lgorithm;                                                                   | 12 |
| IDP, <b>I</b> ntrinsically- <b>D</b> isordered <b>P</b> rotein;                                          | 13 |
| IMP, <b>I</b> ntegrative <b>M</b> odeling <b>P</b> latform;                                              | 14 |
| MA, <b>M</b> emetic Evolutionary <b>A</b> lgorithm;                                                      | 15 |
| MC, <b>M</b> onte <b>C</b> arlo MC-SA, <b>M</b> onte <b>C</b> arlo- <b>S</b> imulated <b>A</b> nnealing; | 16 |
| MD, <b>M</b> olecular <b>D</b> ynamics;                                                                  | 17 |
| MEP, <b>M</b> inimum <b>E</b> nergy <b>P</b> ath                                                         | 18 |
| MFEP, <b>M</b> inimum <b>F</b> ree <b>E</b> nergy <b>P</b> ath                                           | 19 |
| MGA, <b>M</b> emetic <b>G</b> enetic <b>A</b> lgorithm;                                                  | 20 |
| MM, <b>M</b> olecular <b>M</b> echanics;                                                                 | 21 |
| MO-EA, <b>M</b> ulti <b>O</b> bjective EA;                                                               | 22 |
| MO-GA, <b>M</b> ulti <b>O</b> bjective GA                                                                | 23 |
| MSM, <b>M</b> arkov <b>S</b> tate <b>M</b> odel;                                                         | 24 |
| MWC, <b>M</b> onod- <b>W</b> yman- <b>C</b> hangeaux;                                                    | 25 |
| NEB, <b>N</b> udged <b>E</b> lastic <b>B</b> and;                                                        | 26 |
| NMA, <b>N</b> ormal <b>M</b> ode <b>A</b> nalysis                                                        | 27 |
| NMR, <b>N</b> uclear <b>M</b> agnetic <b>R</b> esonance;                                                 | 28 |
| NOE, <b>N</b> uclear <b>O</b> verhauser <b>E</b> ffect;                                                  | 29 |
| PDB, <b>P</b> rotein <b>D</b> ata <b>B</b> ank;                                                          | 30 |
| PDST, <b>P</b> ath-directed <b>S</b> ubdivision <b>T</b> ree;                                            | 31 |
| PNM, <b>P</b> lastic <b>N</b> etwork <b>M</b> odel;                                                      | 32 |
| PRM, <b>P</b> robabilistic <b>R</b> oad <b>M</b> ap;                                                     | 33 |
| QM, <b>Q</b> uantum <b>M</b> echanics;                                                                   | 34 |
| RDC, <b>R</b> esidual <b>D</b> ipolar <b>C</b> oupling;                                                  | 35 |
| RMSD, <b>R</b> oot- <b>M</b> ean- <b>S</b> quared <b>D</b> eviation;                                     | 36 |
| RRT, <b>R</b> apidly-exploring <b>R</b> andom <b>T</b> ree;                                              | 37 |
| TPS, <b>T</b> ransition <b>P</b> ath <b>S</b> ampling;                                                   | 38 |
| TST, <b>T</b> ransition <b>S</b> <b>T</b> heory;                                                         | 39 |
| VMD, <b>V</b> isual <b>M</b> olecular <b>D</b> ynamics;                                                  | 40 |
| WEM, <b>W</b> eighted <b>E</b> nsemble <b>M</b> ethod;                                                   | 41 |
